# Supplementary material for: Pregnancy-Associated Bleeding and Genetics: Five Sequence Variants in the Myometrium and Progesterone Signaling Pathway are associated with postpartum hemorrhage
Source: PubMed Central journal article supplement — medRxiv. 2023 Aug 15:2023.08.10.23293932. Preprint. [Version 1] doi: 10.1101/2023.08.10.23293932 (PMC10462219; doi:10.1101/2023.08.10.23293932), 2023-08-15
Supplement: NIHPP2023.08.10.23293932v1-supplement-3.pdf [file NIHPP2023.08.10.23293932v1-supplement-3.pdf]

## Supplementary Text

### Ethical approvals

The deCODE study was approved by the Icelandic National Bioethics Committee (VSN-15-169). The North West Research Ethics Committee reviewed and approved UK Biobank's scientific protocol and operational procedures (REC reference no.: 06/MRE08/65).

Approval of the Copenhagen Hospital Biobank Reproductive Health Study (CHB-RHS) was obtained from the Danish National Committee on Health Research Ethics (NVK-1805807) and the Capital Region Data Protection Agency (P-2019-49).

All study participants provided a signed informed consent, and the study protocol has been approved by the administrative board of the Norwegian Mother, Father and Child Cohort Study, led by the Norwegian Institute of Public Health. The establishment of MoBa and initial data collection was based on a license from the Norwegian Data Protection Agency and approval from The Regional Committee for Medical Research Ethics. The study was approved by the Norwegian Regional Committee for Medical and Health Research Ethics South-East (2015/2425) and by the Swedish Ethical Review Authority (Dnr 2022-03248-01).

Participants in FinnGen provided informed consent for biobank research on basis of the Finnish Biobank Act. Alternatively, separate research cohorts, collected before the Finnish Biobank Act came into effect (in September 2013) and the start of FinnGen (August 2017) were collected on the basis of study-specific consent and later transferred to the Finnish biobanks after approval by Fimea, the National Supervisory Authority for Welfare and Health. Recruitment protocols followed the biobank protocols approved by Fimea. The Coordinating Ethics Committee of the Hospital District of Helsinki and Uusimaa (HUS) approved the FinnGen study protocol (number HUS/990/2017). The FinnGen study is approved by the Finnish Institute for Health and welfare (approval number THL/2031/6.02.00/2017, amendments THL/1101/5.05.00/2017, THL/341/6.02.00/2018, THL/2222/6.02.00/2018, THL/283/6.02.00/2019 and THL/1721/5.05.00/2019), the Digital and Population Data Service Agency (VRK43431/2017-3, VRK/6909/2018-3 and VRK/4415/2019-3), the Social Insurance Institution (KELA) (KELA 58/522/2017, KELA 131/522/2018, KELA 70/522/2019 and KELA 98/522/2019) and Statistics Finland (TK-53-1041-17).

The activities of the EstBB are regulated by the Human Genes Research Act, which was adopted in 2000 specifically for the operations of the EstBB. All Estonian Biobank participants have signed a broad informed consent form and analyses were carried out under ethical approval 1.1-12/624 from the Estonian Committee on Bioethics and Human Research (Estonian Ministry of Social Affairs) and data release N05 from the EstBB.

## Supplementary Figures

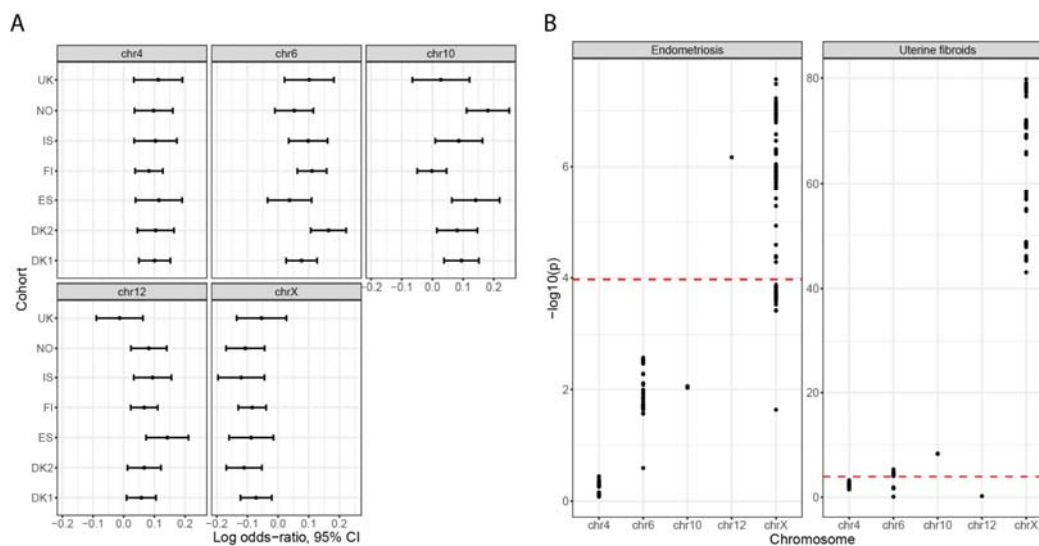

Supplementary Figure 1. (A) Effect sizes in each cohort for the postpartum hemorrhage lead variants, which were largely similar. (B) Genome-wide significant variants from the postpartum hemorrhage analysis are also associated with endometriosis and uterine fibroids. The red line indicates the Bonferroni corrected  $p$ -value threshold ( $p < 0.05/(2 \text{ loci} * 234 \text{ variants}) = 0.0001$ ).

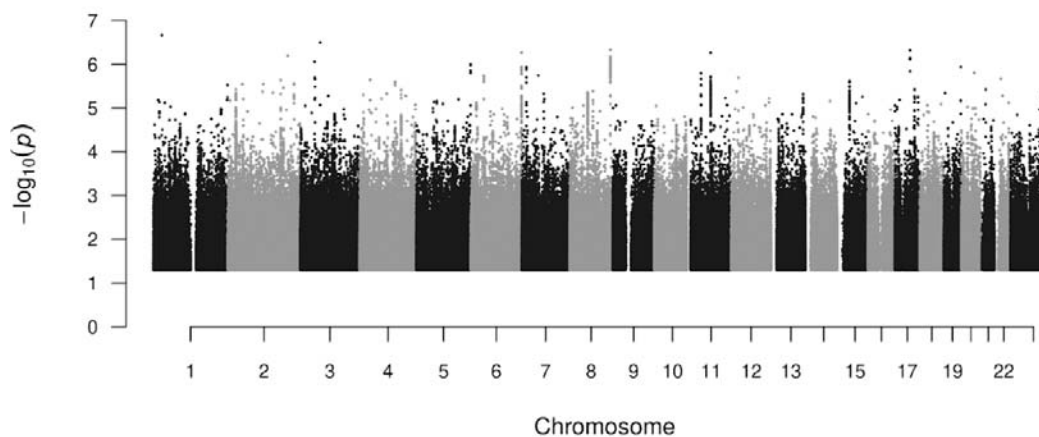

Supplementary Figure 2. Manhattan plot for Early bleeding, all outcomes.

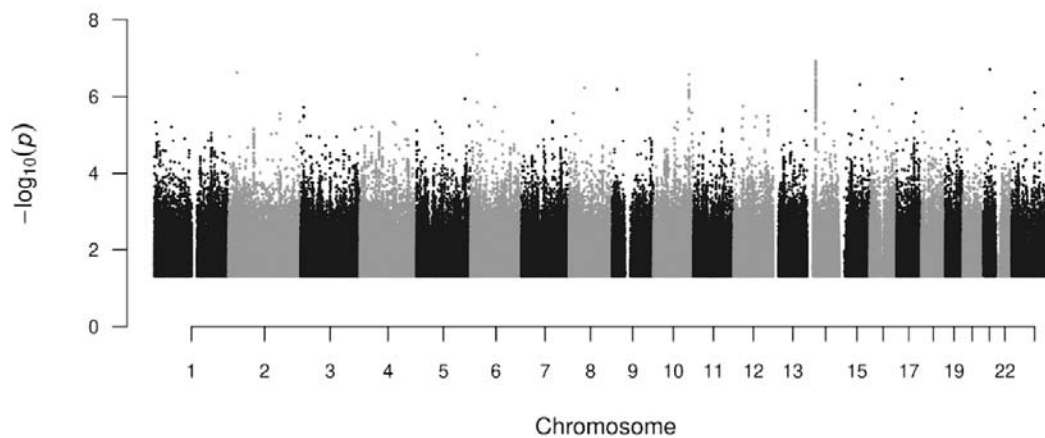

Supplementary Figure 3. Supplementary Figure 2: Manhattan plot for Early bleeding, ending in live birth.

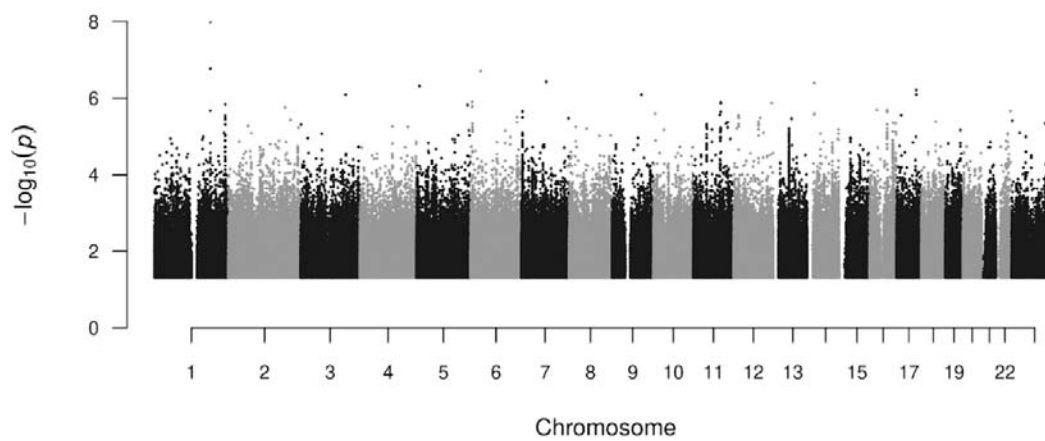

Supplementary Figure 4. Manhattan plot for antepartum hemorrhage

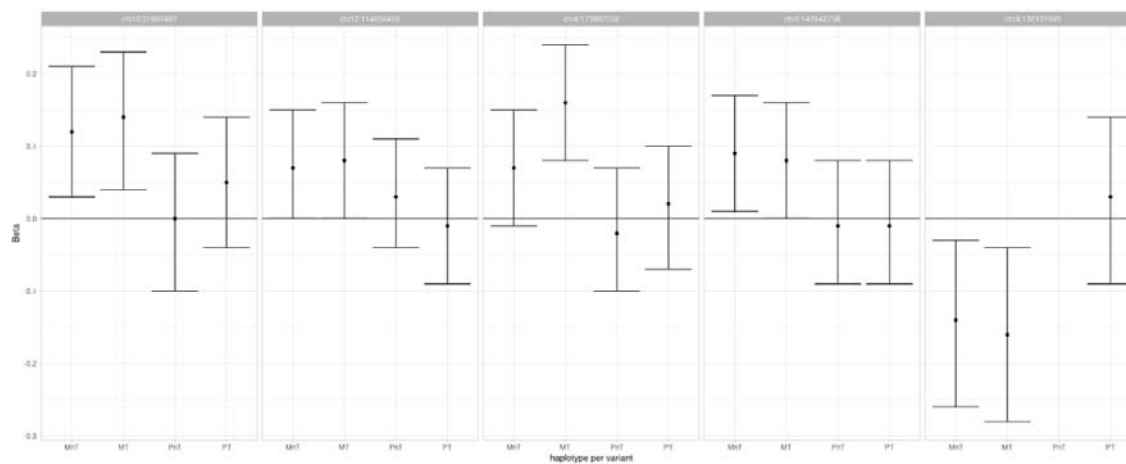

*Supplementary Figure 5. Haplotype analysis of the five PPH associated variants in the MoBa and deCODE cohorts. Results suggest that that effect is mediated through the maternal genome. Mnt: maternal non-transmitted; MT: maternal transmitted; PnT: paternal non-transmitted; PT: paternal transmitted*

## Supplementary Tables

*Supplementary Table 1. The contribution from each of the six Northern European cohorts. n.a. indicates the phenotype was not available in the cohort.*

| PHENOTYPE                             | CHB/DBDS |          | EGCUT  |          | DECODE |          | FINNGEN R6 |          | MOBA  |          | UK BIOBANK |          | TOTAL  |          |
|---------------------------------------|----------|----------|--------|----------|--------|----------|------------|----------|-------|----------|------------|----------|--------|----------|
|                                       | Cases    | Controls | Cases  | Controls | Cases  | Controls | Cases      | Controls | Cases | Controls | Cases      | Controls | Cases  | Controls |
| Early bleeding versus all pregnancies | 10.648   | 70.923   | 10.013 | 23.475   | 388    | 55.588   | 6.380      | 140.681  | n.a.  | n.a.     | 1.469      | 12.227   | 28.898 | 302.894  |
| Early bleeding in women giving birth  | 5.474    | 50.733   | n.a.   | n.a.     | 380    | 55.462   | n.a.       | n.a.     | n.a.  | n.a.     | 502        | 12.227   | 6.356  | 118.422  |
| Antepartum hemorrhage                 | 1.726    | 54.227   | 199    | 24.783   | 672    | 55.079   | n.a.       | n.a.     | n.a.  | n.a.     | 639        | 12.361   | 3.236  | 146.450  |
| Postpartum hemorrhage                 | 7.435    | 43.916   | 1.846  | 22.057   | 2.897  | 52.730   | 4.783      | 108.033  | 2.972 | 21.337   | 1.579      | 11.427   | 21.512 | 259.500  |
| PPH – Atonic                          | 4.597    | 43.916   | 995    | 22.713   | 1.895  | 53.623   | 1.600      | 108.033  | 2.739 | 21.549   | 1.222      | 11.975   | 13.048 | 261.809  |
| PPH – Retained placenta               | 2.500    | 43.916   | 393    | 23.218   | 705    | 54.815   | 2.142      | 108.033  | 299   | 23.989   | 217        | 12.456   | 6.256  | 266.427  |

*Supplementary Table 2. Effect sizes (95% CI and P-value) for the lead variants of PPH for the atoni and retained placenta subtypes, respectively.*

| <b>CHR</b> | <b>RSID</b> | <b>ATONI</b>              | <b>RETAINED PLACENTA</b>  | <b>CASE-CASE GWAS</b>  |
|------------|-------------|---------------------------|---------------------------|------------------------|
| 4          | rs13141656  | 1.10 (1.08-1.13; 9.6e-16) | 1.12 (1.06-1.19; 0.00019) | 1.04 (0.99-1.09; 0.09) |
| 6          | rs12195857  | 1.10 (1.08-1.12; 2e-14)   | 1.12 (1.06-1.17; 4.8e-05) | 1.03 (0.98-1.08; 0.26) |
| 10         | rs11591307  | 1.08 (1.05-1.10; 1.4e-09) | 1.10 (1.02-1.18; 0.019)   | 1.05 (0.99-1.10; 0.08) |
| 12         | rs11067228  | 1.07 (1.05-1.10; 5e-09)   | 1.08 (1.04-1.13; 0.00053) | 1.01 (0.97-1.06; 0.56) |
| X          | rs2747025   | 0.91 (0.88-0.95; 3.1e-08) | 0.92 (0.90-0.95; 2.1e-10) | 1.05 (0.99-1.10; 0.05) |

*Supplementary Table 3. LDSC statistics and inflation metrics*

| <b>PHENOTYPE</b>                                   | <b>LDSC H2,<br/>OBSERVED SCALE<br/>(SE)</b> | <b>LDSC<br/>INTERCEP<br/>T</b> | <b>RATIO</b> | <b>MEAN<br/>CHI<sup>2</sup></b> |
|----------------------------------------------------|---------------------------------------------|--------------------------------|--------------|---------------------------------|
| Early bleeding in pregnancy, all outcomes          | 0.0144 (0.0017)                             | 1.005                          | 0.0688       | 1.08                            |
| Early bleeding in pregnancy, live birth as outcome | 0.009 (0.0035)                              | 0.9929                         | <0           | 1.02                            |
| Antepartum hemorrhage                              | 0.0005 (0.0029)                             | 0.9975                         | NA           | 1                               |
| Postpartum hemorrhage                              | 0.0149 (0.002)                              | 1.0175                         | 0.176        | 1.10                            |
| Postpartum hemorrhage due to atony                 | 0.0101 (0.0018)                             | 1.0092                         | 0.1437       | 1.06                            |
| Postpartum hemorrhage due to retained placenta     | 0.0088 (0.0018)                             | 0.99                           | <0           | 1.05                            |

*Supplementary Table 4: Variants previously associated with traits in the GWAS catalog ( $p < 5 \cdot 10^{-8}$ ), and variants in strong LD ( $r^2 > 0.8$ ) with other variants.*

| <b>CHROMOSOME</b> | <b>LEAD VARIANT</b> | <b>GWAS TRAIT, AS LISTED IN THE GWAS CATALOG</b> | <b>VARIANT IN LD</b> | <b>R<sup>2</sup></b> |
|-------------------|---------------------|--------------------------------------------------|----------------------|----------------------|
| <b>6</b>          | rs12195857          | Educational attainment                           | rs12200809           | 0.83                 |
| <b>10</b>         | rs11591307          | Uterine fibroids                                 | rs11008551           | 0.98                 |
| <b>10</b>         | rs11591307          | Uterine fibroids                                 | rs10508765           | 0.96                 |
| <b>10</b>         | rs11591307          | Uterine leiomyomata                              | rs7090544            | 0.97                 |
| <b>12</b>         | rs11067228          | Heel bone mineral density                        | rs11067228           | 1                    |
| <b>12</b>         | rs11067228          | Prostate-specific antigen levels                 | rs11067228           | 1                    |
| <b>12</b>         | rs11067228          | Serum prostate-specific antigen levels           | rs11067228           | 1                    |
| <b>X</b>          | rs2747025           | Endometriosis                                    | rs5933091            | 1                    |
| <b>X</b>          | rs2747025           | Serum creatinine levels                          | rs5933079            | 1                    |
| <b>X</b>          | rs2747025           | Uterine fibroids                                 | rs5930554            | 1                    |
| <b>X</b>          | rs2747025           | Uterine fibroids                                 | rs12392108           | 1                    |
| <b>X</b>          | rs2747025           | Uterine leiomyomata                              | rs5930554            | 1                    |



*Supplementary Table 5. Post-partum hemorrhage (PPH) lead association sequence variants along with their correlated variants ( $r^2 > 0.80$ ) intersect with enhancer-like sequences (ELS) and CTCF binding sites as defined in ENCODE's encyclopaedia of candidate cis-regulatory elements (cCRE).*

| <b>CCRE TYPE</b>                 | <b>CHR10:316604<br/>83:SG</b>                                                                                | <b>CHR12:114656<br/>455:SG</b> | <b>CHR4:173807<br/>552:SG</b>                   | <b>CHR6:143642<br/>758:SG</b> | <b>CHRX:132131<br/>995:SG</b>                                                 |
|----------------------------------|--------------------------------------------------------------------------------------------------------------|--------------------------------|-------------------------------------------------|-------------------------------|-------------------------------------------------------------------------------|
| <i>CTCF-only-<br/>CTCF-bound</i> |                                                                                                              |                                |                                                 |                               | chrX:1322312<br>35:SG                                                         |
| <i>dELS</i>                      | chr10:3162381<br>7:IG:0:0,<br>chr10:3162381<br>7:IG:0:1,<br>chr10:3162381<br>8:M:2,<br>chr10:3166608<br>7:SG |                                | chr4:1738074<br>15:SG,<br>chr4:1738075<br>52:SG |                               | chrX:1322948<br>19:SG,<br>chrX:1323537<br>29:IG:0,<br>chrX:1323537<br>29:IG:1 |
| <i>dELS-CTCF-<br/>bound</i>      | chr10:3166048<br>3:SG                                                                                        |                                |                                                 |                               | chrX:1323697<br>22:SG                                                         |
| <i>pELS-CTCF-<br/>bound</i>      |                                                                                                              | chr12:114656<br>455:SG         |                                                 | chr6:1436784<br>53:IG         |                                                                               |

*Supplementary Table 6. Enriched cCRE by Samples: PPH signals were tested for enrichment within cCREs of 1519 different samples representing 421 different tissues or cell types (UBERON and CL IDs). Shown are nominally significant results ( $P < 0.05$ ).*

| <b>TISSUE /CELL LINE</b> | <b>ENCODE IDS</b> | <b>ANNOTATED PPH SIGNALS, N</b> | <b>P-VALUE</b> | <b>EXPECTED PROPORTION OF ANNOTATED PPH SIGNALS</b> | <b>GENOME COVERED (BP) BY ANNOTATION</b> |
|--------------------------|-------------------|---------------------------------|----------------|-----------------------------------------------------|------------------------------------------|
| uterus                   | ENCFF434PEE       | 5/5                             | 0.00709        | 39%                                                 | 62148258                                 |
| uterus                   | ENCFF938GZV       | 4/5                             | 0.02003        | 27%                                                 | 28616727                                 |
| urinary bladder          | ENCFF225SLW       | 4/5                             | 0.02326        | 29%                                                 | 32611476                                 |
| forelimb muscle          | ENCFF193CYW       | 4/5                             | 0.02412        | 29%                                                 | 32101010                                 |

*Supplementary Table 7. GWA signals in cCREs: PPH signals were nominally enriched within cCREs found in four (out of 1519) samples representing three different tissues (uterus, urinary bladder and forelimb muscle). Shown are the lead sequence variants (columns) or their correlated variants that were found in overlap with cCREs as defined in each of the five samples.*

| <b>TISSUE /CELL LINE</b> | <b>ENCODE IDS</b>                                | <b>CHR10:31660<br/>483:SG</b>                                                                                              | <b>CHR12:1146<br/>56455:SG</b> | <b>CHR4:1738<br/>07552:SG</b>                             | <b>CHR6:1436<br/>42758:SG</b> | <b>CHRX:1321<br/>31995:SG</b> |
|--------------------------|--------------------------------------------------|----------------------------------------------------------------------------------------------------------------------------|--------------------------------|-----------------------------------------------------------|-------------------------------|-------------------------------|
| uterus                   | <b>uterus<br/>(ENCF434PE<br/>E)</b>              | <i>chr10:316238<br/>17:IG.0:0,<br/>chr10:316238<br/>17:IG.0:1,<br/>chr10:316238<br/>18:M:2,<br/>chr10:316604<br/>83:SG</i> | <i>chr12:11465<br/>6455:SG</i> | <i>chr4:17380<br/>7415:SG,<br/>chr4:17380<br/>7552:SG</i> | <i>chr6:14367<br/>8453:IG</i> | <i>chrX:13236<br/>9722:SG</i> |
| uterus                   | <b>uterus<br/>(ENCF938G<br/>ZV)</b>              | <i>chr10:31623<br/>817:IG.0:0,<br/>chr10:31623<br/>817:IG.0:1,<br/>chr10:31623<br/>818:M:2,<br/>chr10:31660<br/>483:SG</i> | <i>chr12:11465<br/>6455:SG</i> | <i>chr4:17380<br/>7415:SG,<br/>chr4:17380<br/>7552:SG</i> | <i>chr6:14367<br/>8453:IG</i> |                               |
| urinary<br>bladder       | <b>urinary<br/>bladder<br/>(ENCF225SL<br/>W)</b> | <i>chr10:316238<br/>17:IG.0:0,<br/>chr10:316238<br/>17:IG.0:1,<br/>chr10:316238<br/>18:M:2,<br/>chr10:316604<br/>83:SG</i> | <i>chr12:11465<br/>6455:SG</i> | <i>chr4:17380<br/>7415:SG,<br/>chr4:17380<br/>7552:SG</i> | <i>chr6:14367<br/>8453:IG</i> |                               |
| forelimb<br>muscle       | <b>forelimb<br/>muscle<br/>(ENCF193CY<br/>W)</b> | <i>chr10:316238<br/>17:IG.0:0,<br/>chr10:316238<br/>17:IG.0:1,<br/>chr10:316238<br/>18:M:2</i>                             |                                | <i>chr4:17380<br/>7415:SG,<br/>chr4:17380<br/>7552:SG</i> | <i>chr6:14367<br/>8453:IG</i> | <i>chrX:13236<br/>9722:SG</i> |

*Supplementary Table 8. Enriched epimap: PPH signals were tested for enrichment within enhancers (A/G) as defined in 833 samples by Epimap. Shown are nominally significant results ( $P < 0.05$ ).*

| <b>TISSUE<br/>/CELL LINE</b> | <b>EPIMAP<br/>IDS</b> | <b>ANNOTATED<br/>PPH<br/>SIGNALS, N</b> | <b>P-<br/>VALUE</b> | <b>EXPECTED<br/>PROPORTION<br/>OF<br/>ANNOTATED<br/>PPH SIGNALS</b> | <b>GENOME<br/>COVERED (BP)<br/>BY<br/>ANNOTATION</b> |
|------------------------------|-----------------------|-----------------------------------------|---------------------|---------------------------------------------------------------------|------------------------------------------------------|
| UTERUS                       | BSS01884              | 4/5                                     | 0.0085              | 22%                                                                 | 50940614                                             |
| MESENDODERM DERIV            | BSS01263              | 3/5                                     | 0.013               | 12%                                                                 | 22150855                                             |

*Supplementary Table 9. Predicted gene targets, Epimap: PPH signals were most strongly enriched among enhancers (Active/Genic) found in uterus and three other tissues in Epimap\*. Shown is the intersection for each PPH signal (lead variant and their correlated variants given  $r^2 > 0.80$ ) with enhancers in each of the most strongly enriched tissues where  $P < 0.05$ , nominally significant, and the predicted gene target for those enhancers.*

| <b>TISSUE /<br/>CELL-TYPE</b> | <b>10P11.22<br/>(CHR10:31660<br/>483:SG)</b> | <b>12Q24.21<br/>(CHR12:114656<br/>455:SG)</b> | <b>6Q24.2<br/>(CHR6:14364<br/>2758:SG)</b> | <b>XQ26.2<br/>(CHRX:132131995:<br/>SG)</b>                                               | <b>4Q34.1<br/>(CHR4:17380<br/>7552:SG)</b> |
|-------------------------------|----------------------------------------------|-----------------------------------------------|--------------------------------------------|------------------------------------------------------------------------------------------|--------------------------------------------|
| UTERUS                        |                                              | TBX3<br>(chr12:114656<br>455:SG)              |                                            | FRMD7<br>(chrX:132120786:S<br>G,chrX:132126844:<br>SG), RAP2C<br>(chrX:132266705:S<br>G) |                                            |
| MESENDO<br>DERM_DE<br>RIV     |                                              | TBX3<br>(chr12:114656<br>455:SG)              |                                            | FRMD7<br>(chrX:132120786:S<br>G)                                                         |                                            |

Supplementary Table 10. Haplotype effect estimates for the five PPH associated loci.

|     | Haplotype Variant | MOBA   |               |         | DECODE |              |       | META   |               |         |       |      |
|-----|-------------------|--------|---------------|---------|--------|--------------|-------|--------|---------------|---------|-------|------|
|     |                   | effect | 95%CI         | P       | effect | 95%CI        | P     | effect | 95%CI         | P       | P_het | I2   |
| MT  | chr10:31660483    | 0.13   | (0.03;0.22)   | 0.0099  | 0.23   | (-0.08;0.54) | 0.15  | 0.14   | (0.04;0.23)   | 0.0039  | 0.53  | 0    |
|     | 12:114656455      | 0.07   | (-0.01;0.15)  | 0.095   | 0.2    | (-0.05;0.46) | 0.11  | 0.08   | (0.00;0.16)   | 0.038   | 0.32  | 0.9  |
|     | 4:173807552       | 0.16   | (0.08;0.25)   | 0.00019 | 0.13   | (-0.16;0.42) | 0.37  | 0.16   | (0.08;0.24)   | 0.00012 | 0.83  | 0    |
|     | 6:143642758       | 0.06   | (-0.03;0.15)  | 0.17    | 0.24   | (-0.02;0.50) | 0.071 | 0.08   | (-0.00;0.16)  | 0.060   | 0.20  | 38.9 |
|     | X:132131995       | -0.16  | (-0.28;-0.04) | 0.0099  | -0.13  | (-0.56;0.31) | 0.57  | -0.16  | (-0.28;-0.04) | 0.0084  | 0.88  | 0    |
| MnT | 10:31660483       | 0.12   | (0.03;0.22)   | 0.012   | 0.09   | (-0.26;0.44) | 0.60  | 0.12   | (0.03;0.21)   | 0.010   | 0.88  | 0    |
|     | 12:114656455      | 0.06   | (-0.02;0.14)  | 0.17    | 0.25   | (-0.02;0.52) | 0.066 | 0.07   | (-0.00;0.15)  | 0.065   | 0.17  | 45.9 |
|     | 4:173807552       | 0.06   | (-0.02;0.15)  | 0.15    | 0.12   | (-0.18;0.43) | 0.43  | 0.07   | (-0.01;0.15)  | 0.11    | 0.72  | 0    |
|     | 6:143642758       | 0.07   | (-0.01;0.16)  | 0.095   | 0.28   | (0.00;0.55)  | 0.046 | 0.09   | (0.01;0.17)   | 0.028   | 0.16  | 49   |
|     | X:132131995       | -0.17  | (-0.30;-0.05) | 0.0048  | 0.06   | (-0.25;0.36) | 0.71  | -0.14  | (-0.26;-0.03) | 0.013   | 0.17  | 48   |
| PT  | 10:31660483       | 0.04   | (-0.06;0.13)  | 0.47    | 0.18   | (-0.13;0.50) | 0.25  | 0.05   | (-0.04;0.14)  | 0.3     | 0.38  | 0    |
|     | 12:114656455      | -0.03  | (-0.11;0.05)  | 0.48    | 0.17   | (-0.08;0.43) | 0.18  | -0.01  | (-0.09;0.07)  | 0.80    | 0.13  | 55.4 |
|     | 4:173807552       | 0.02   | (-0.06;0.11)  | 0.62    | -0.07  | (-0.36;0.23) | 0.66  | 0.02   | (-0.07;0.10)  | 0.72    | 0.58  | 0    |
|     | 6:143642758       | -0.04  | (-0.13;0.05)  | 0.38    | 0.28   | (0.02;0.54)  | 0.035 | -0.01  | (-0.09;0.08)  | 0.88    | 0.023 | 80.8 |
|     | X:132131995       | 0.02   | (-0.09;0.14)  | 0.69    | 0.04   | (-0.38;0.46) | 0.85  | 0.03   | (-0.09;0.14)  | 0.66    | 0.94  | 0    |
| PnT | 10:31660483       | -0.01  | (-0.11;0.09)  | 0.80    | 0.11   | (-0.25;0.47) | 0.55  | 0      | (-0.10;0.09)  | 0.93    | 0.52  | 0    |
|     | 12:114656455      | 0.04   | (-0.04;0.12)  | 0.37    | -0.02  | (-0.32;0.27) | 0.89  | 0.03   | (-0.04;0.11)  | 0.41    | 0.71  | 0    |
|     | 4:173807552       | -0.01  | (-0.10;0.08)  | 0.83    | -0.13  | (-0.48;0.21) | 0.44  | -0.02  | (-0.10;0.07)  | 0.69    | 0.49  | 0    |
|     | 6:143642758       | 0      | (-0.09;0.08)  | 0.94    | -0.04  | (-0.34;0.27) | 0.82  | -0.01  | (-0.09;0.08)  | 0.90    | 0.84  | 0    |
|     | 12:114656455      | 0.04   | (-0.04;0.12)  | 0.37    | -0.02  | (-0.32;0.27) | 0.89  | 0.03   | (-0.04;0.11)  | 0.41    | 0.71  | 0    |
|     | 4:173807552       | -0.01  | (-0.10;0.08)  | 0.83    | -0.13  | (-0.48;0.21) | 0.44  | -0.02  | (-0.10;0.07)  | 0.69    | 0.49  | 0    |
|     | 6:143642758       | 0      | (-0.09;0.08)  | 0.94    | -0.04  | (-0.34;0.27) | 0.82  | -0.01  | (-0.09;0.08)  | 0.90    | 0.84  | 0    |

Mnt: maternal non-transmitted; MT: maternal transmitted; PnT: paternal non-transmitted; PT: paternal transmitted

*Supplementary Table 11. Data sets used to generate summary statistics for genetic correlation analysis. ICE: deCODE genetics; GBR: UK Biobank; DNK: CHB/DBDS; FIN: FinnGen r7*

| <i>Trait</i>                     | <i>PPH</i> | <i>EB</i> | <i>Analysis</i> | <i>cases</i> | <i>ctrls</i> | <i>Datasets/Reference</i>  |
|----------------------------------|------------|-----------|-----------------|--------------|--------------|----------------------------|
| <i>Pregnancy loss</i>            |            | x         | <i>meta</i>     | 49.996       | 174.109      | PMID: 33239672             |
| <i>Uterine fibroids</i>          | x          | x         | <i>meta</i>     | 49.418       | 893.310      | ICE_GBR_FIN                |
| <i>Endometriosis</i>             | x          | x         | <i>meta</i>     | 25.137       | 881.619      | ICE_GBR_DNK_FIN            |
| <i>Gestational diabetes</i>      | x          |           | <i>meta</i>     | 9.507        | 928.959      | ICE_GBR_FIN                |
| <i>Birth weight, fetal</i>       | x          |           | <i>meta</i>     | 419.140      |              | PMID: 34282336             |
| <i>Birth weight, maternal</i>    | x          |           | <i>meta</i>     | 268.129      |              | PMID: 34282336             |
| <i>Gestational age, maternal</i> | x          |           | GWAS            | 59.496       |              | ICE                        |
| <i>Gestational age, fetal</i>    | x          |           | GWAS            | 125.228      |              | ICE                        |
| <i>Body mass index</i>           | x          | x         | <i>meta</i>     | 509.458      |              | ICE_GBR                    |
| <i>Smoking</i>                   |            |           | <i>meta</i>     | 313.810      | 581.902      | ICE_GBR_FIN                |
| <i>Alcohol dependence</i>        |            |           | <i>meta</i>     | 29.557       | 707.411      | ICE_GBR                    |
| <i>Education years</i>           |            |           | GWAS            | 403.567      |              | GBR                        |
| <i>Risk taking</i>               |            |           | GWAS            | 107.158      | 323.889      | GBR                        |
| <i>HDL Cholesterol</i>           |            |           | <i>meta</i>     | 548.375      |              | ICE_GBR                    |
| <i>Type 2 diabetes</i>           | x          | x         | <i>meta</i>     | 88.062       | 916.726      | ICE_GBR_FIN                |
| <i>Systolic blood pressure</i>   | x          | x         | <i>meta</i>     | 508.767      |              | ICE_GBR                    |
| <i>Diastolic blood pressure</i>  | x          | x         | <i>meta</i>     | 508.764      |              | ICE_GBR                    |
| <i>Hypertension</i>              | x          | x         | <i>meta</i>     | 347.202      | 901.986      | ICE_GBR_DNK_FIN            |
| <i>Coronary artery disease</i>   | x          | x         | <i>meta</i>     | 172.831      | 1.051.258    | ICE_GBR_DNK_FIN            |
| <i>Myocardial infarction</i>     | x          | x         | <i>meta</i>     | 76.141       | 1.121.254    | ICE_GBR_DNK_FIN            |
| <i>Atrial fibrillation</i>       | x          | x         | <i>meta</i>     | 108.925      | 970.342      | ICE_GBR_DNK_FIN            |
| <i>Heart failure</i>             | x          | x         | <i>meta</i>     | 88.888       | 1.184.381    | ICE_GBR_DNK_FIN            |
| <i>Stroke ischemic</i>           |            | x         | <i>meta</i>     | 83.860       | 1.049.069    | ICE_GBR_FIN PMID: 29531354 |



|                                        |          |          |              |                |                  |                        |
|----------------------------------------|----------|----------|--------------|----------------|------------------|------------------------|
| <i>Stroke intracerebral hemorrhage</i> |          | <i>x</i> | <i>daisy</i> | <i>12.224</i>  | <i>339.944</i>   | <i>ICE</i>             |
| <i>Post traumatic stress disorder</i>  | <i>x</i> | <i>x</i> | <i>meta</i>  | <i>5.067</i>   | <i>1.023.714</i> | <i>ICE_GBR_USA_FIN</i> |
| <i>Stress</i>                          | <i>x</i> | <i>x</i> | <i>GWAS</i>  | <i>12.655</i>  | <i>19.225</i>    | <i>PMID: 31116379</i>  |
| <i>Major depression</i>                | <i>x</i> | <i>x</i> | <i>meta</i>  | <i>59.851</i>  | <i>113.154</i>   | <i>PMID: 29700475</i>  |
| <i>Asthma</i>                          | <i>x</i> | <i>x</i> | <i>meta</i>  | <i>125.769</i> | <i>842.132</i>   | <i>ICE_GBR_FIN</i>     |
| <i>Hypothyroidism</i>                  | <i>x</i> | <i>x</i> | <i>meta</i>  | <i>62.503</i>  | <i>787.353</i>   | <i>ICE_GBR_FIN</i>     |
| <i>Cholelithiasis</i>                  | <i>x</i> | <i>x</i> | <i>meta</i>  | <i>23.087</i>  | <i>721.958</i>   | <i>ICE_GBR</i>         |

*Supplementary Table 12: Effect sizes for the standardized polygenic risk scores of PPH and birth weight.*

| <b>VARIABLE</b> | <b>EFFECT SIZE, LOG-ODDS</b> | <b>95% CI</b> |
|-----------------|------------------------------|---------------|
| PPH             | 1.08                         | 1.05;1.11     |
| Birth weight    | 1.14                         | 1.10; 1.17    |

Supplementary Table 13: Cohort definitions

| PHENOTYPE                                         | CODES                                                                                                                                                           | EXCLUSION                                                                                  | NOTE                                                                                                                       |
|---------------------------------------------------|-----------------------------------------------------------------------------------------------------------------------------------------------------------------|--------------------------------------------------------------------------------------------|----------------------------------------------------------------------------------------------------------------------------|
| Bleeding in early pregnancy ending in any outcome | ICD8:<br>ICD9:<br>ICD10:O20.*                                                                                                                                   | Known coagulation disorders (D66-D69, O46.0, O67.0)                                        |                                                                                                                            |
| Bleeding in early pregnancy leading to live birth | ICD8:<br>ICD9:<br>ICD10:O20.*                                                                                                                                   | Known coagulation disorders (D66-D69, O46.0, O67.0)                                        | Code must have occurred within the gestational period leading to a stillbirth or livebirth.                                |
| Antepartum hemorrhage                             | ICD8:<br>ICD9:<br>ICD10: O46                                                                                                                                    | Known coagulation disorders (D66-D69, O46.0, O67.0)                                        |                                                                                                                            |
| Postpartum hemorrhage                             | ICD8:<br>ICD9:<br>ICD10: O72<br><br>Post-2012 (DK only):<br>ICD10: O72 (with >500mL blood loss)                                                                 | Known coagulation disorders (D66-D69, O46.0, O67.0)<br>Multifold pregnancy Cesarean sectio | In Denmark, it has since 2012 been mandatory to report the amount of blood lost during birth along with the O72 diagnosis. |
| PPH due to atony                                  | ICD8:<br>ICD9:<br>ICD10: O72.1, and no trauma/retained tissue<br><br>Post-2012 (DK only):<br>ICD10: O72 (with >500mL blood loss), and no trauma/retained tissue | Known coagulation disorders (D66-D69, O46.0, O67.0)<br>Multifold pregnancy Cesarean sectio |                                                                                                                            |
| PPH due to retained placenta                      | ICD8:<br>ICD9:<br>ICD10: O72.2<br><br>Post-2012 (DK only):<br>ICD10: O72 (with >500mL blood loss) + O73                                                         | Known coagulation disorders (D66-D69, O46.0, O67.0)<br>Multifold pregnancy Cesarean sectio |                                                                                                                            |
